# Supplementary material
Source: ML conference proceedings conference paper supplement (https://aclanthology.org/D17-1121)
Supplement: Attachment [file learning-word-relatedness_sup_material.pdf › learning-word-relatedness_sup_material.pdf]

# Learning Word Relatedness over Time - Supplemental Material

## 1 Understanding Dynamics of Relations (Section 3.2)

Here we supply a detailed explanation and pseudo code for our peak detection algorithm.

Let  $L = (t_1, v_1), (t_2, v_2), \dots, (t_n, v_n)$  be a list of tuples, where  $t_i$  are time periods and  $v_i$  are values. Given  $L$ , Algorithm 1 returns a list of peak periods, i.e.  $\{t \in L \mid t \text{ contains a peak}\}$ .

The first step is to find relative maxima: we scan  $L$  and look for pairs  $(t_i, v_i)$  such that  $v_{i-1} < v_i > v_{i+1}$ , i.e.  $v_i$  is a local maximum. We apply two minimum thresholds in order to filter insignificant points:  $abs_{min}$  is an absolute threshold, which below it we consider the peak not to be significant enough.  $coef_{min}$  is a relative threshold which facilitates removing points that are much lower than the highest maximum (lines 4–5 in the algorithm). In our experiments, we empirically chose over a validation set  $abs_{min} = 0.1$ ,  $coef_{min} = 0.8$ . The final step of the algorithm is to find plateaus which will also be considered part of the peak. For each peak point, the algorithm considers the point's surrounding neighbors. Those identified as close in their value to the current peak, are added to the peak list.

## 2 Temporal Classifier (Section 3.3.2)

Algorithm 2 shows the pseudo code of the Temporal Classifier.

---

**Algorithm 1:** Peak detection algorithm

---

**Input:**  $L = \{(t, v) \mid t \text{ are time periods, } v \text{ are values}\}$ , and constants  $coef_{min}, abs_{min}$

**Output:** Peak list

```
1 begin
2    $Peaks, RelativePeaks \leftarrow \emptyset$ 
3    $Maxima \leftarrow FindMaxima(L)$ 
4    $v_{max} \leftarrow \max_v(L)$ 
5    $T_{min} \leftarrow \max(v_{max}/coef_{min}, abs_{min})$ 
6   for  $(t, v) \in Maxima$  do
7     if  $v > T_{min}$  then
8       | Add  $(t, v)$  to  $RelativePeaks$ 
9     end
10  end
11  for  $peak = (t, v) \in RelativePeaks$  do
12    for  $(t_n, v_n) \in Neighbors(peak)$  do
13      | if  $v_n$  is close to  $v$  then
14        | | Add  $(t, v)$  to  $Peaks$ 
15      | end
16    end
17  end
18  return  $Peaks$ 
19 end
```

---

---

**Algorithm 2:** Classifier using temporal model algorithm

---

**Input:** Temporal relation  $r = (e_1, e_2, y)$  and classifier  $Cl_r$

**Output:** True if  $e_1, e_2$  are predicted to relate during year  $y$ ,  
otherwise false

```
1 begin
2    $History \leftarrow \emptyset$ 
3   foreach year  $Y$  do
4      $History[Y] \leftarrow \cos(v_1^Y, v_2^Y)$ 
5   end
6    $Peaks \leftarrow PeakDetection(History)$ 
7    $isPeak \leftarrow 1$  if  $y \in Peaks$ , o.w. 0
8    $prediction \leftarrow Cl_r(v_1^y, v_2^y, y, isPeak)$ 
9   return  $true \iff prediction > 0$ 
10 end
```

---
